# Supplementary material for: Role of Electrical Stimulation in Peripheral Nerve Regeneration: A Systematic Review
Source: PubMed Central journal article supplement — Plast Reconstr Surg Glob Open. 2022 Mar 18;10(3):e4115. doi: 10.1097/GOX.0000000000004115 (PMC8932473; doi:10.1097/gox.0000000000004115), 2022-03-18
Supplement: gox-10-e4115-s001.pdf [file gox-10-e4115-s001.pdf]

SDC 1: Variables extracted from individual studies

Author, year of publication, study type, number of patients and demographics, mechanism of injury, pre-operative diagnosis, nerve type and injury classification, pre-operative and post-operative examination, treatment, outcome measures, duration of follow-up, and complications.
