# Supplementary material for: Role of Electrical Stimulation in Peripheral Nerve Regeneration: A Systematic Review
Source: PubMed Central journal article supplement — Plast Reconstr Surg Glob Open. 2022 Mar 18;10(3):e4115. doi: 10.1097/GOX.0000000000004115 (PMC8932473; doi:10.1097/gox.0000000000004115), 2022-03-18

|  | Wong 2015 | Power 2019 | Piccinini 2020 | Gordon 2010 |                                                           |
|--|-----------|------------|----------------|-------------|-----------------------------------------------------------|
|  | +         | +          | +              | +           | Random sequence generation (selection bias)               |
|  | +         | +          | +              | +           | Allocation concealment (selection bias)                   |
|  | +         | +          | ?              | -           | Blinding of participants and personnel (performance bias) |
|  | +         | +          | +              | -           | Blinding of outcome assessment (detection bias)           |
|  | +         | +          | -              | +           | Incomplete outcome data (attrition bias)                  |
|  | +         | +          | +              | +           | Selective reporting (reporting bias)                      |
|  | +         | +          | +              | +           | Other bias                                                |

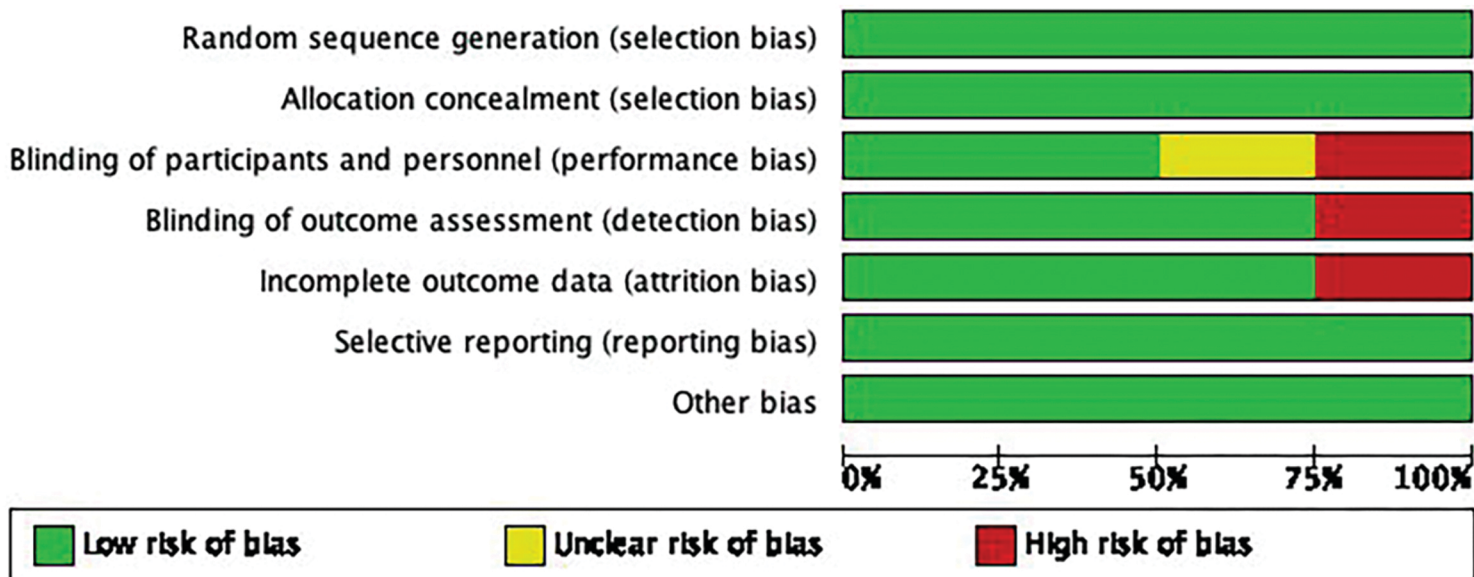

Supplement: gox-10-e4115-s002.pdf [file gox-10-e4115-s002.pdf]
